# Supplementary material for: A Preliminary Study on Antimicrobial Susceptibility of Staphylococcus spp. and Enterococcus spp. Grown on Mannitol Salt Agar in European Wild Boar (Sus scrofa) Hunted in Campania Region—Italy
Source: MDPI journal article supplement (doi:10.3390/ani12010085), 2021-12-31
Supplement: s1 [file s1]

## Supplementary Materials

**Supplementary Table S1:** Matrix assisted laser desorption/ionization-time of flight mass spectrometry (MALDI-TOF-MS) identification of Gram-positive bacteria isolated on Mannitol Salt Agar (MSA).

| ID  | Genus and species identification  | score value |
|-----|-----------------------------------|-------------|
| 2   | <i>Staphylococcus sciuri</i>      | 1.92        |
| 7   | <i>Enterococcus faecalis</i>      | 2.50        |
| 9   | <i>Enterococcus faecalis</i>      | 2.36        |
| 10  | <i>Enterococcus faecalis</i>      | 2.39        |
| 11  | <i>Enterococcus faecalis</i>      | 2.36        |
| 12  | <i>Enterococcus faecalis</i>      | 2.40        |
| 13  | <i>Enterococcus casseliflavus</i> | 2.15        |
| 14  | <i>Enterococcus faecalis</i>      | 2.41        |
| 17  | <i>Enterococcus faecalis</i>      | 2.47        |
| 18  | <i>Staphylococcus chromogenes</i> | 2.24        |
| 19  | <i>Macrococcus canis</i>          | 2.05        |
| 20  | <i>Staphylococcus chromogenes</i> | 2.19        |
| 21  | <i>Macrococcus canis</i>          | 2.22        |
| 22  | <i>Staphylococcus xylosus</i>     | 2.03        |
| 23  | <i>Staphylococcus xylosus</i>     | 2.07        |
| 25  | <i>Enterococcus faecalis</i>      | 2.36        |
| 27  | <i>Macrococcus canis</i>          | 2.03        |
| 28  | <i>Bacillus mojavensis</i>        | 1.91        |
| 29  | <i>Bacillus subtilis</i>          | 1.92        |
| 30  | <i>Enterococcus faecalis</i>      | 2.01        |
| 31a | <i>Enterococcus faecalis</i>      | 2.31        |
| 31b | <i>Enterococcus faecalis</i>      | 2.31        |
| 32  | <i>Macrococcus canis</i>          | 2.22        |
| 33  | <i>Bacillus amyloliquefaciens</i> | 1.85        |
| 34  | <i>Staphylococcus simulans</i>    | 2.33        |
| 35  | <i>Enterococcus faecalis</i>      | 2.31        |
| 36  | <i>Staphylococcus xylosus</i>     | 2.12        |
| 37  | <i>Enterococcus faecalis</i>      | 2.31        |
| 38  | <i>Enterococcus faecalis</i>      | 2.32        |
| 39a | <i>Bacillus megaterium</i>        | 1.96        |
| 39b | <i>Enterococcus faecalis</i>      | 2.32        |
| 40a | <i>Staphylococcus sciuri</i>      | 1.95        |
| 40b | <i>Staphylococcus xylosus</i>     | 2.01        |
| 43  | <i>Bacillus licheniformis</i>     | 1.91        |
| 44  | <i>Staphylococcus hyicus</i>      | 1.91        |
| 45a | <i>Staphylococcus chromogenes</i> | 2.24        |
| 45b | <i>Bacillus licheniformis</i>     | 1.90        |
| 46  | <i>Bacillus pumilus</i>           | 1.71        |
| 47a | <i>Staphylococcus hyicus</i>      | 1.90        |
| 47b | <i>Staphylococcus chromogenes</i> | 2.14        |
| 48  | <i>Staphylococcus xylosus</i>     | 2.20        |
| 49  | <i>Staphylococcus hyicus</i>      | 1.93        |
